# Supplementary material for: Glucose-6-phosphate dehydrogenase deficiency accelerates pancreatic acinar-to-ductal metaplasia
Source: PubMed Central journal article supplement — bioRxiv. 2023 Nov 8:2023.11.06.565895. Preprint. [Version 1] doi: 10.1101/2023.11.06.565895 (PMC10659312; doi:10.1101/2023.11.06.565895), 2023-11-08
Supplement: NIHPP2023.11.06.565895V1-supplement-1.pdf [file NIHPP2023.11.06.565895V1-supplement-1.pdf]

**A.****Acinar Genes**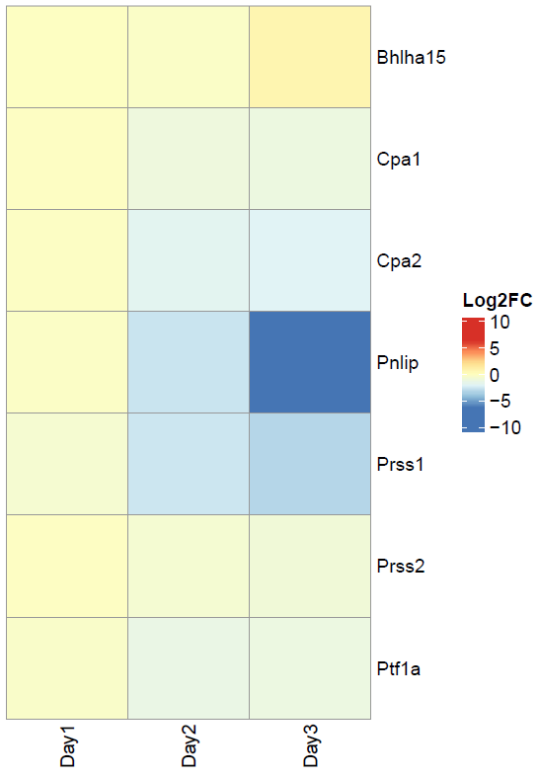**B.****Ductal Genes**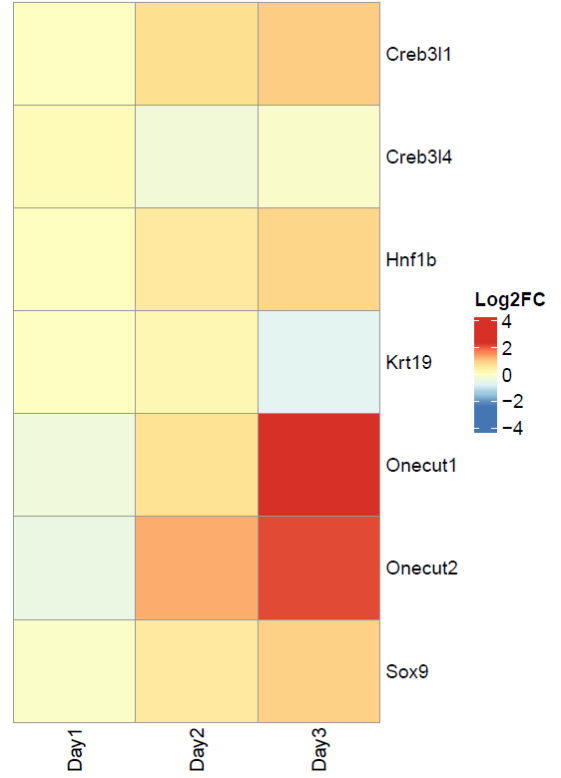

**Supplemental Figure 1. Heatmaps of acinar and ductal genes from RNA-sequencing**

- A.** Log<sub>2</sub>FC expression of several acinar genes from RNA-sequencing of *ex vivo* acinar cell cultures at Day 1, 2, or 3 compared to GFP.
- B.** Log<sub>2</sub>FC expression of several ductal/ADM genes from RNA-sequencing of *ex vivo* acinar cell cultures at Day 1, 2, or 3 compared to GFP.

**A.**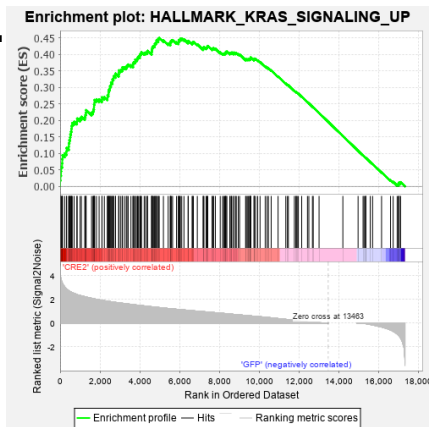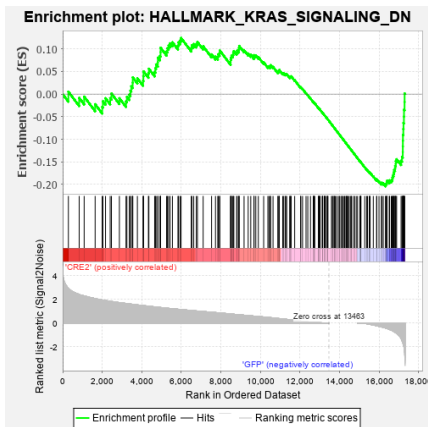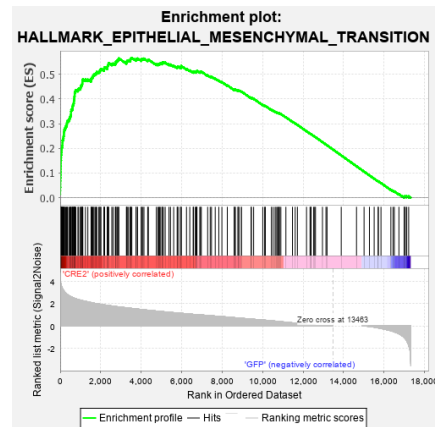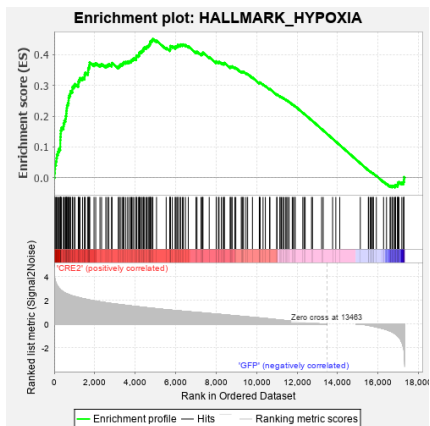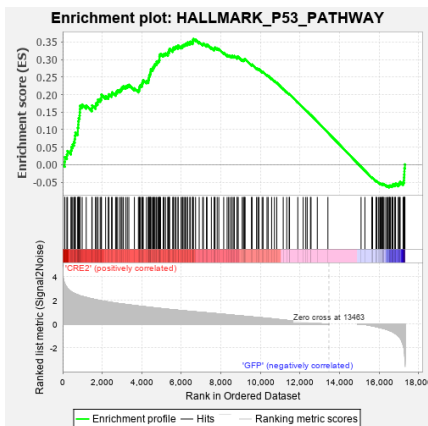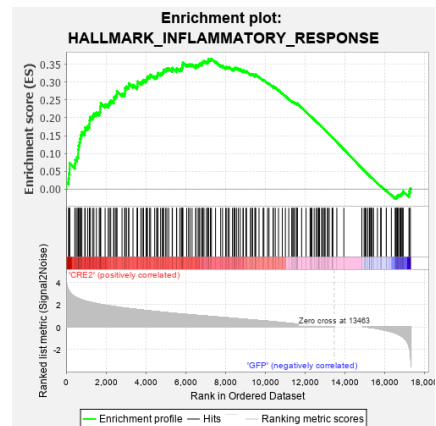**B.**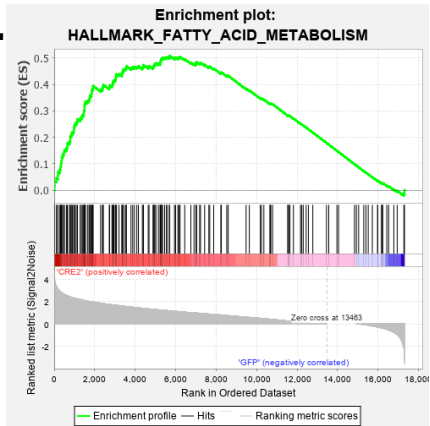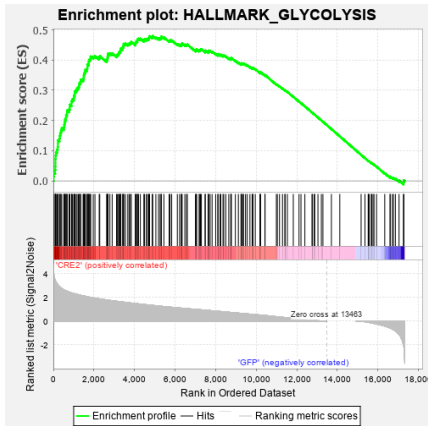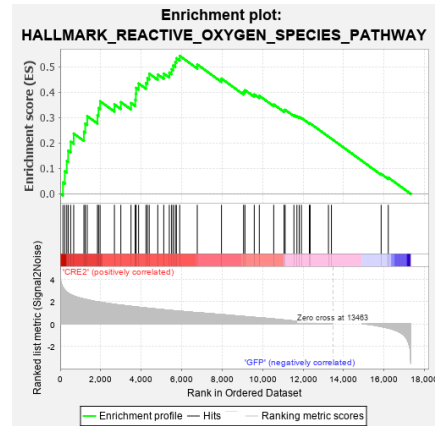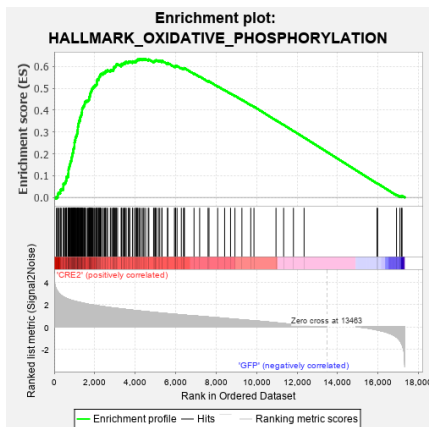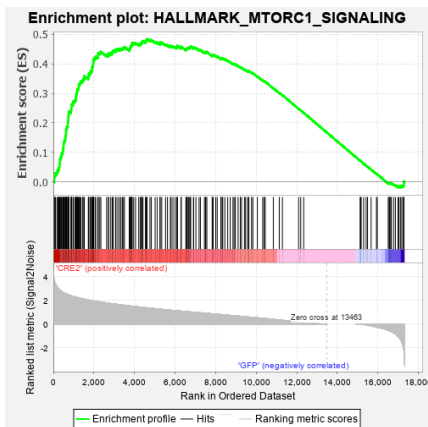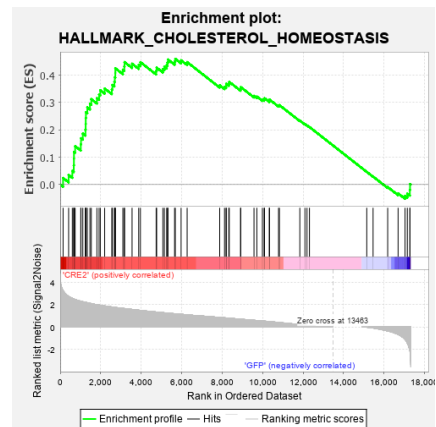

## **Supplemental Figure 2. Differentially expressed pathways and GSEAs from RNA-sequencing**

**A.** Selected Hallmark GSEA plots of known pathways in ADM that are enriched in *Kras*<sup>G12D</sup>-expressing acinar cells (Cre2 vs. GFP).

**B.** Selected Hallmark GSEA plots of metabolic pathways that are enriched in *Kras*<sup>G12D</sup>-expressing acinar cells (Cre2 vs. GFP).

Enrichment score (ES) signifies the degree a gene set is overrepresented at the top or bottom of a ranked list of genes. The black vertical bars show where genes within the gene set appear in ranked list. The waterfall plot represents a gene's correlation with a phenotype.

### A. Cre2 vs. GFP

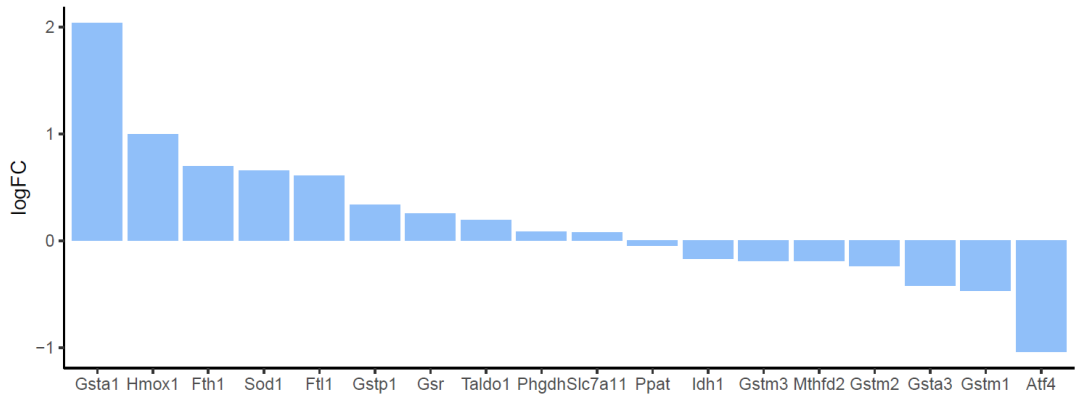

### B. Cre3 vs. GFP

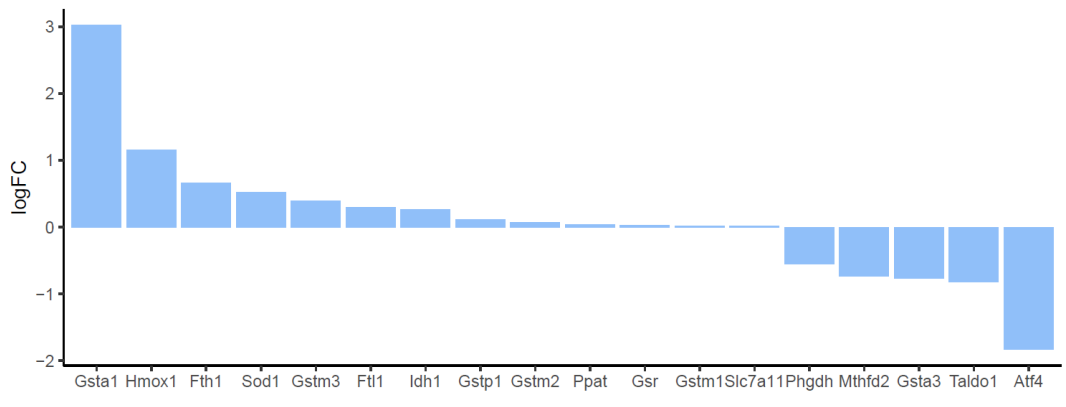

**Supplemental Figure 3. Additional NRF2 target genes from RNA-sequencing**

- A.** LogFC expression of additional NRF2-target genes from RNA-sequencing of *Kras*<sup>G12D</sup>-expressing acinar cells when comparing Cre2 to GFP.
- B.** LogFC expression of additional NRF2-target genes from RNA-sequencing of *Kras*<sup>G12D</sup>-expressing acinar cells when comparing Cre3 to GFP.

♀ Ptf1a<sup>Cre/+</sup>;G6pd<sup>mut/wt</sup>

X

♂ LSL-Kras<sup>G12D</sup>;G6pd<sup>mut/y</sup>

or

♂ LSL-Kras<sup>G12D</sup>;G6pd<sup>wt/y</sup>

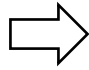

Mutant:

♀ LSL-Kras<sup>G12D</sup>; Ptf1a<sup>Cre/+</sup>;G6pd<sup>mut/mut</sup>

♂ LSL-Kras<sup>G12D</sup>; Ptf1a<sup>Cre/+</sup> G6pd<sup>mut/y</sup>

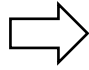

Wildtype:

♀ LSL-Kras<sup>G12D</sup>; Ptf1a<sup>Cre/+</sup>;G6pd<sup>wt/wt</sup>

♂ LSL-Kras<sup>G12D</sup>; Ptf1a<sup>Cre/+</sup>;G6pd<sup>wt/y</sup>

#### **Supplemental Figure 4. Breeding scheme to generate KC;G6pd<sup>mut</sup> and KC;G6pd<sup>wt</sup> mice**

Mice with mutant *G6pd*, that mimics human G6PD-deficiency, were bred into the KC (*LSL-Kras<sup>G12D/+</sup>; Ptf1aCre*) line. *Ptf1aCre* was always maintained in female breeders. Experiments used both male and female *G6pd* mutant mice, where females were homozygous for mutant *G6pd* (*G6pd<sup>mut/mut</sup>*) and males were hemizygous for mutant *G6pd* (*G6pd<sup>mut/y</sup>*), as *G6pd* is an X-linked gene. *G6pd* wildtype mice used in experiments were obtained in the same colony and age matched littermates of *G6pd* mutant mice when possible. Female *G6pd* wildtype mice have two wildtype copies of *G6pd* (*G6pd<sup>wt/wt</sup>*) and males have one wildtype copy (their only copy) of *G6pd* (*G6pd<sup>wt/y</sup>*). In the schematics and labelling, “y” in male mice refers to the y chromosome, which does not contain a copy of *G6pd*.



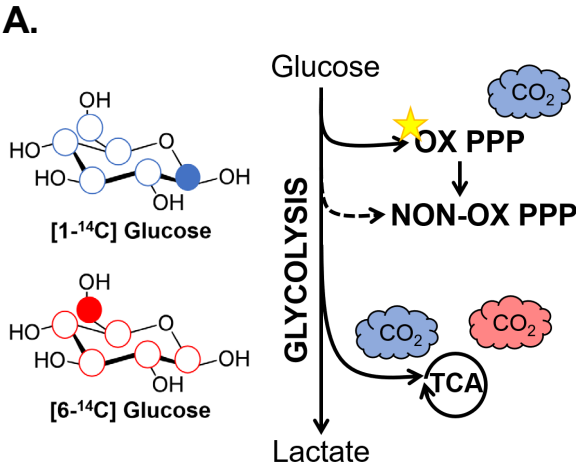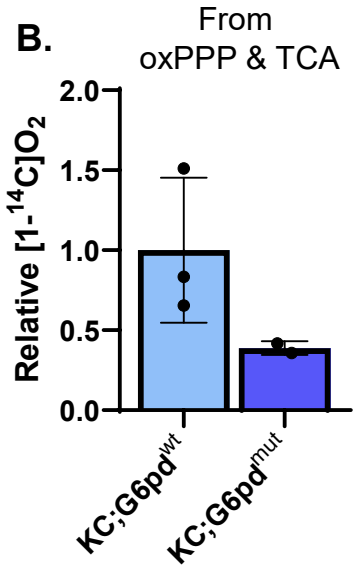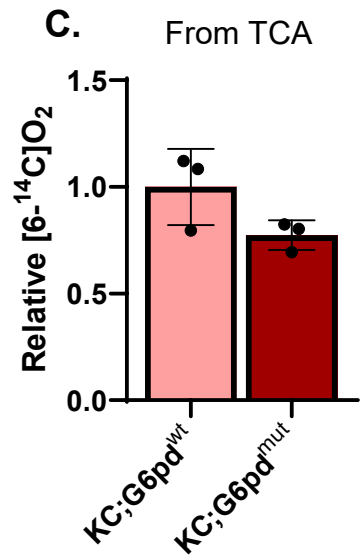

### **Supplemental Figure 5. <sup>14</sup>C-labeling in acinar cells**

**A.** Schematic of <sup>14</sup>C-labeling experiment. [1-<sup>14</sup>C]glucose (blue) can be used in both the oxidative pentose phosphate pathway (ox PPP) and the TCA cycle. [6-<sup>14</sup>C]glucose (red) can be used in the TCA cycle.

**B.** Relative amount of [<sup>14</sup>C]-labeled CO<sub>2</sub> derived from [1-<sup>14</sup>C]glucose. [1-<sup>14</sup>C]O<sub>2</sub> is generated from either the oxidative pentose phosphate pathway or the TCA cycle.

**C.** Relative amount of [<sup>14</sup>C]-labeled CO<sub>2</sub> derived from [6-<sup>14</sup>C]glucose. [6-<sup>14</sup>C]O<sub>2</sub> is only generated from the TCA cycle.

Each point in B and C represents technical replicates from one mouse.

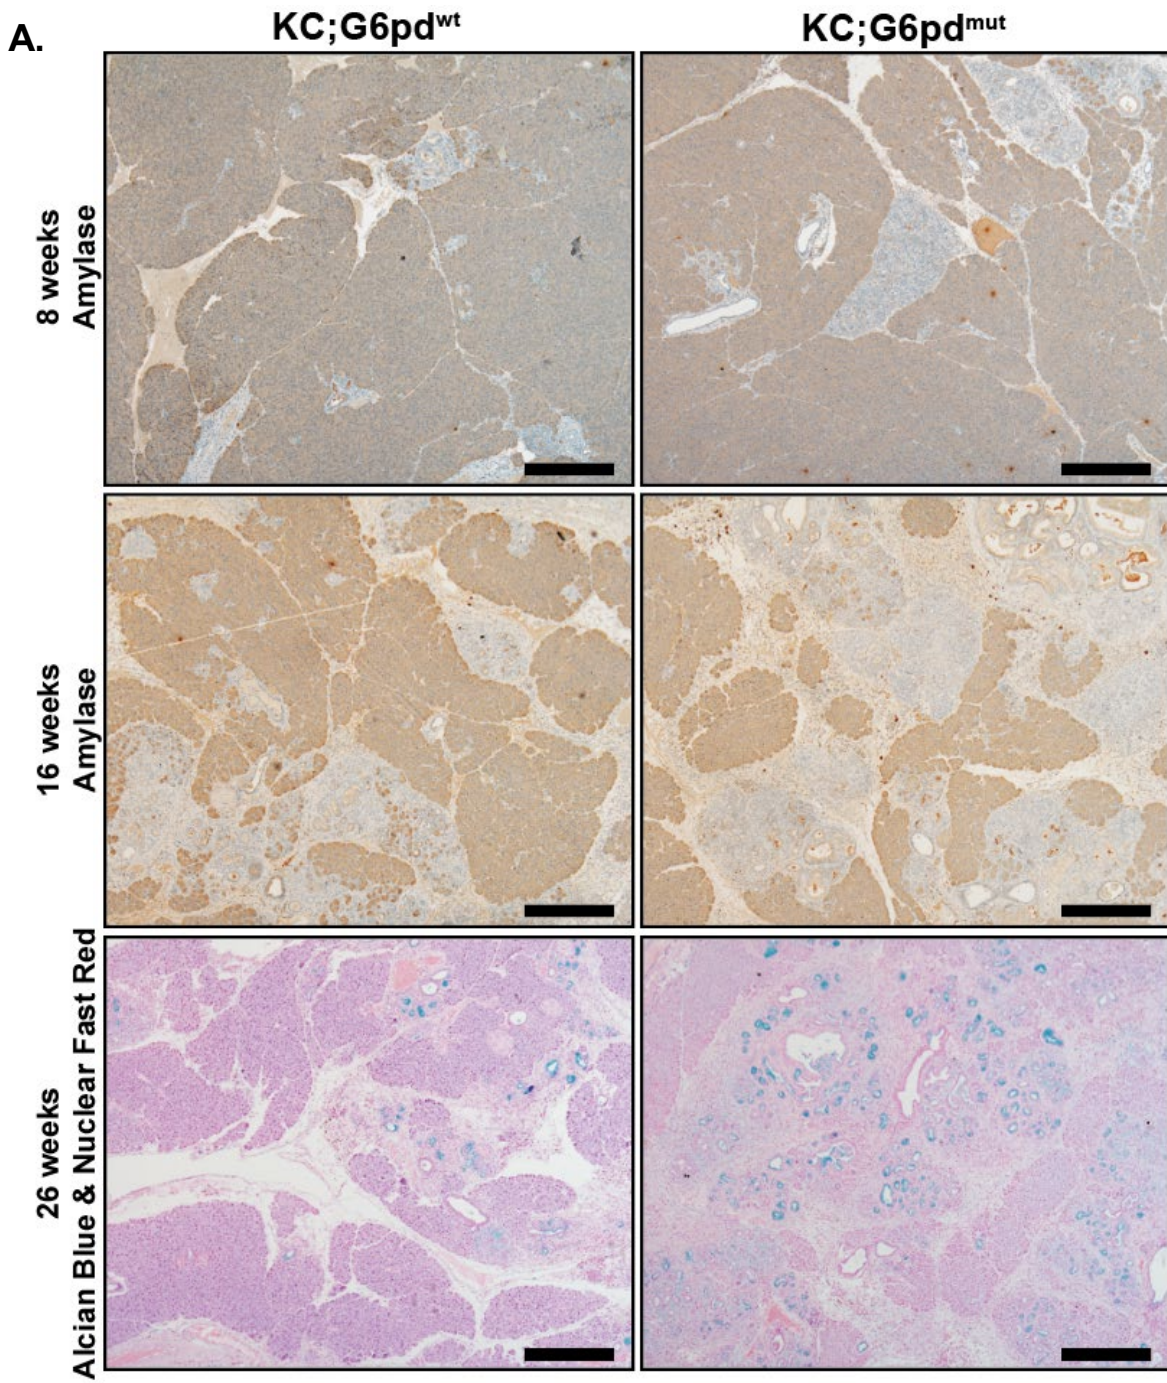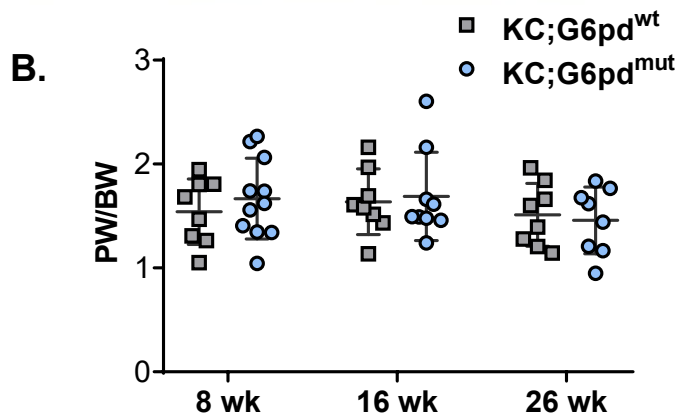

**Supplemental Figure 6. Low magnification images of Amylase and Alcian blue in pancreata and pancreas weight to body weight ratios**

**A.** Immunostaining for Amylase (AMY), in 8-week and 16-week-old KC;G6pd<sup>wt</sup> and KC;G6pd<sup>mut</sup> pancreas. Alcian blue (PanIN-produced mucin) & nuclear fast red counterstain in pancreas of 26-week-old KC;G6pd<sup>wt</sup> and KC;G6pd<sup>mut</sup> mice. Scale bar = 500µm.

**B.** Pancreas weight (PW) to body weight (BW) ratios in 8-, 16-, and 26-week-old KC;G6pd<sup>wt</sup> and KC;G6pd<sup>mut</sup> mice.
